# Supplementary material for: Genome-wide association study identifies Sjögren’s risk loci with functional implications in immune and glandular cells
Source: PubMed Central journal article supplement (PMC9329286; doi:10.1038/s41467-022-30773-y), 2022-07-27
Supplement: 41467_2022_30773_MOESM2_ESM.pdf [file 41467_2022_30773_MOESM2_ESM.pdf]

## Description of Additional Supplementary Files

File Name: Supplementary Data 1

Description: Replication of previously established GWS regions outside of the HLA in Sjogren's disease.

File Name: Supplementary Data 2

Description: Summary of samples contributed by each collaborating institution/cohort

File Name: Supplementary Data 3

Description: Suggestive GWS regions in Sjogren's disease of European Ancestry

File Name: Supplementary Data 4

Description: Epigenetic Enrichment Analysis of GWS Sjögren-SNPs in different cells and tissues

File Name: Supplementary Data 5

Description: Association analysis in CRHR1 locus.

File Name: Supplementary Data 6

Description: Bayesian Analysis in CRHR1 locus.

File Name: Supplementary Data 7

Description: CRHR1 Blood Traits

File Name: Supplementary Data 8

Description: Association analysis in CD247 locus.

File Name: Supplementary Data 9

Description: Bayesian Analysis in CD247 locus.

File Name: Supplementary Data 10

Description: eQTL, Looping and Regulatory chromatin states for functional variants in CD247 locus.

File Name: Supplementary Data 11

Description: Association analysis in XKR6 locus.

File Name: Supplementary Data 12

Description: Bayesian Analysis in XKR6 locus.

File Name: Supplementary Data 13

Description: eQTL, Looping and Regulatory chromatin states for functional variants in XKR6 locus.

File Name: Supplementary Data 14

Description: Association analysis in SYNGR1 locus.

File Name: Supplementary Data 15

Description: Bayesian Analysis in SYNGR1 locus.

File Name: Supplementary Data 16

Description: eQTL, Looping and Regulatory chromatin states for functional variants in SYNGR1 locus.

File Name: Supplementary Data 17

Description: Association analysis in NAB1 locus.

File Name: Supplementary Data 18

Description: Bayesian Analysis in NAB1 locus.

File Name: Supplementary Data 19

Description: eQTL, Looping and Regulatory chromatin states for functional variants in NAB1 locus.

File Name: Supplementary Data 20

Description: Association analysis in CHMP6 locus.

File Name: Supplementary Data 21

Description: Bayesian Analysis in CHMP6 locus.

File Name: Supplementary Data 22

Description: eQTL, Looping and Regulatory chromatin states for functional variants in CHMP6 locus.

File Name: Supplementary Data 23

Description: Association analysis in PRDM1-ATG5 locus.

File Name: Supplementary Data 24

Description: Bayesian Analysis in PRDM1-ATG5 locus.

File Name: Supplementary Data 25

Description: eQTL, Looping and Regulatory chromatin states for functional variants in PRDM1-ATG5 locus.

File Name: Supplementary Data 26

Description: Association analysis in MIR146A-PTTG1 locus.

File Name: Supplementary Data 27

Description: Bayesian Analysis in MIR146A-PTTG1 locus.

File Name: Supplementary Data 28

Description: eQTL, Looping and Regulatory chromatin states for functional variants in MIR146A-PTTG1 locus.

File Name: Supplementary Data 29

Description: Association analysis in TNFAIP3 locus.

File Name: Supplementary Data 30

Description: Bayesian Analysis in TNFAIP3 locus.

File Name: Supplementary Data 31

Description: eQTL, Looping and Regulatory chromatin states for functional variants in TNFAIP3 locus.

File Name: Supplementary Data 32

Description: Association analysis in TYK2 locus.

File Name: Supplementary Data 33

Description: Bayesian Analysis in TYK2 locus.

File Name: Supplementary Data 34

Description: eQTL, Looping and Regulatory chromatin states for functional variants in TYK2 locus.
